# Supplementary material for: Enzymatic ring-opening polymerization (ROP) of lactides and lactone in ionic liquids and organic solvents: digging the controlling factors
Source: Royal Society of Chemistry journal article supplement (doi:10.1039/c7ra09038b), 2017-01-01
Supplement: c7ra09038b1.pdf [file c7ra09038b1.pdf]

*Electronic Supplementary Material (ESI)*

**Enzymatic Ring-Opening Polymerization (ROP) of Lactides and Lactone in  
Ionic Liquids and Organic Solvents: Digging the Controlling Factors**

Hua Zhao,<sup>\*,1,2</sup> Gabrielle A. Nathaniel,<sup>2</sup> and Princess C. Merenini<sup>2</sup>

<sup>1</sup> Department of Chemistry and Biochemistry, University of Northern Colorado, Greeley, CO  
80639, USA

<sup>2</sup> Department of Chemistry and Forensic Science, Savannah State University, Savannah, GA  
31404, USA

---

\* Corresponding author. Email: [hua.zhao@unco.edu](mailto:hua.zhao@unco.edu), or [huazhao98@gmail.com](mailto:huazhao98@gmail.com) (currently at University of Northern Colorado).

**Table S1** Comparison of enzymatic ROP of lactides under different reaction conditions

| #  | Lactide | Lipase <sup>a</sup> | Solvent <sup>b</sup>                 | Water (%)                    | T (°C) | t/d | Conversion (%) | Yield (%) | M <sub>w</sub> | PDI  | Ref. |
|----|---------|---------------------|--------------------------------------|------------------------------|--------|-----|----------------|-----------|----------------|------|------|
| 1  | DL      | N435, 3 wt%         | –                                    | unknown                      | 80     | 7   | 0              | 0         | –              | –    | 1    |
| 2  | L       | N435, 6 wt%         | –                                    | unknown                      | 100    | 10  | 91             | –         | 2,440          | 2.6  | 2    |
| 3  | L       | Free CALB           | –                                    | unknown                      | 130    | 1   | –              | 54.1      | 45,200         | 1.13 | 3    |
| 4  | L       | Free CALB           | toluene (1/1, w/w)                   | unknown                      | 120    | 1   | 100            | 17.3      | 49,800         | 1.17 | 3    |
| 5  | L       | Free CALB           | [BMIM][BF <sub>4</sub> ] (1/1, w/w)  | unknown                      | 110    | 1   | 96.2           | 24.3      | 68,300         | 1.25 | 3    |
| 6  | L       | N435, 10 wt%        | [BMIM][PF <sub>6</sub> ] (7/10, w/w) | unknown                      | 65     | 11  | –              | 29.5      | 700            | 1.2  | 4    |
| 7  | L       | N435, 10 wt%        | [BMIM][PF <sub>6</sub> ] (7/10, w/w) | unknown                      | 90     | 5   | –              | –         | 23,500         | 1.2  | 5    |
| 8  | L       | N435, 10 wt%        | [HMIM][PF <sub>6</sub> ] (7/10, w/w) | unknown                      | 90     | 7   | –              | 63.2      | 49,100         | 1.3  | 6    |
| 9  | L       | N435, 10 wt%        | [HMIM][PF <sub>6</sub> ] (7/10, w/w) | unknown                      | 65     | 9   | –              | 51.1      | 1,800          | 1.2  | 6    |
| 10 | L       | N435, 15 wt%        | scCO <sub>2</sub>                    | <i>a</i> <sub>w</sub> < 0.16 | 65     | 3   | 35.2           | 5.16      | 11,900         | 1.25 | 7    |
| 11 | L       | N435, 12.5 wt%      | toluene (1/2, g/mL)                  | unknown                      | 70     | 3   | 0              | 0         | –              | –    | 8    |
| 12 | D       | N435, 12.5 wt%      | toluene (1/2, g/mL)                  | unknown                      | 70     | 3   | 33             | 25        | 4,000          | 1.2  | 8    |
| 13 | L       | N435, 10 wt%        | toluene                              | unknown                      | 70     | 2   | 23             | 23        | –              | –    | 9    |
| 14 | DL      | N435, 10 wt%        | toluene                              | unknown                      | 70     | 2   | 5              | –         | –              | –    | 9    |
| 15 | D       | N435, 10 wt%        | toluene                              | unknown                      | 70     | 2   | 98             | 90        | 4,600          | 1.3  | 9    |
| 16 | D       | PS, 3 wt%           | –                                    | unknown                      | 100    | 7   | 96             | 5         | 59,000         | 1.2  | 1    |
| 17 | DL      | PS, 3 wt%           | –                                    | unknown                      | 100    | 7   | 82             | 8         | 69,000         | 1.2  | 1    |
| 18 | L       | PS, 3 wt%           | –                                    | unknown                      | 100    | 7   | 82             | 8         | 48,000         | 1.2  | 1    |
| 19 | D       | PS, 5 wt%           | toluene                              | unknown                      | 90     | 2   | 14             | 5         | –              | –    | 9    |
| 20 | DL      | PS, 5 wt%           | toluene                              | unknown                      | 90     | 2   | 20             | 10        | 550            | 1.1  | 9    |
| 21 | L       | PS, 5 wt%           | toluene                              | unknown                      | 90     | 2   | 80             | 65        | 770            | 1.1  | 9    |
| 22 | L       | PPL, 1wt%           | –                                    | unknown                      | 100    | 7   | –              | –         | 17,600         | 1.9  | 10   |
| 23 | D       | PPL, 1wt%           | –                                    | unknown                      | 100    | 7   | –              | –         | 27,000         | 1.4  | 10   |
| 24 | DL      | PPL, 1wt%           | –                                    | unknown                      | 100    | 7   | –              | –         | 26,600         | 2.1  | 10   |

**Note:** <sup>a</sup> N435 = Novozym 435; PS = lipase PS from *Burkholderia cepacia*; lipase concentration (wt%) based on monomer; <sup>b</sup> the number in parenthesis indicates the substrate/solvent ratio.

**Table S2** Water contents in monomers, enzymes, and solvents

| <b>Name</b>                                                      | <b>Manufacturer and catalog number</b> | <b>Lot number</b>   | <b>Water content (wt%)</b> |
|------------------------------------------------------------------|----------------------------------------|---------------------|----------------------------|
| L(-)-lactide                                                     | Sigma 367044                           | STBF8444V           | 0.16                       |
| L(-)-lactide                                                     | TCI L0115                              | KFISL-NP            | 0.08                       |
| D(-)-lactide                                                     | Ark Pharm AK-57455                     | WG0123247-170118001 | 0.22                       |
| DL-lactide                                                       | Sigma 303143                           | BCBR2168V           | 0.12                       |
| DL-lactide                                                       | TCI L0091                              | OLMDE-DH            | 0.08                       |
| Novozym 435 (05/2009)                                            | Sigma L4777                            | 097K1155            | 0.77                       |
| Novozym 435 (09/2009)                                            | Sigma L4777                            | 067K3522            | 1.09                       |
| Novozym 435 (03/2016)-electrostatic                              | Sigma L4777                            | SLBP0766V           | 1.09                       |
| Novozym 435 (03/2017)                                            | Sigma L4777                            | SLBS9524            | 1.94                       |
| Novozym 435 (05/2017)-electrostatic                              | Sigma L4777                            | SLBT3895            | 1.97                       |
| Novozym 435 (03/2016) dried over P <sub>2</sub> O <sub>5</sub>   | Sigma L4777                            | SLBP0766V           | 1.26                       |
| Novozym 435 (05/2009), $a_w = 0.11$ (KCl)                        | Sigma L4777                            | 097K1155            | 2.62                       |
| Novozym 435 (09/2009), $a_w = 0.11$ (KCl)                        | Sigma L4777                            | 067K3522            | 2.52                       |
| Novozym 435 (03/2016), $a_w = 0.11$ (KCl)                        | Sigma L4777                            | SLBP0766V           | 2.26                       |
| Novozym 435 (03/2017), $a_w = 0.11$ (KCl)                        | Sigma L4777                            | SLBS9524            | 2.38                       |
| Novozym 435 (05/2009), $a_w = 0.33$ (MgCl <sub>2</sub> )         | Sigma L4777                            | 097K1155            | 3.62                       |
| Novozym 435 (03/2016), $a_w = 0.33$ (MgCl <sub>2</sub> )         | Sigma L4777                            | SLBP0766V           | 3.49                       |
| Novozym 435 (03/2017), $a_w = 0.33$ (MgCl <sub>2</sub> )         | Sigma L4777                            | SLBS9524            | 2.77                       |
| CALB on Immobead 150                                             | Sigma 54326                            | BCBN4171V           | 1.27                       |
| CALB on Immobead 150, $a_w = 0.11$                               | Sigma 54326                            | BCBN4171V           | 2.39                       |
| Free CALB                                                        | Sigma 62288                            | BCBP3380V           | 4.14                       |
| CALB-CLEA, 2.7 U/mg                                              | Sigma 16698                            | BCBQ6594V           | 14.04                      |
| Amano lipase PS from <i>Burkholderia cepacia</i>                 | Sigma 534641                           | MKBV0029V           | 3.26                       |
| Amano lipase PS                                                  | Amano                                  | LPSAC0750102        | 1.78                       |
| lipase from porcine pancreas (PPL), type II                      | Sigma L3126                            | 074K0610            | 4.44                       |
| lipase from porcine pancreas (PPL), type II                      | Sigma L3126                            | SLBL2143V           | 3.51                       |
| lipase PS-C Amano I                                              | Amano                                  | ILPSAC0350403R      | 1.16                       |
| lipase PS-D Amano I                                              | Amano                                  | ILPSAB0152305R      | 1.22                       |
| Amano lipase A from <i>Aspergillus niger</i>                     | Aldrich 53478-1                        | KI07922HI           | 5.05                       |
| lipase from <i>Pseudomonas cepacia</i> immobilized in sol-gel-AK | Sigma 62279                            | 047096/1            | 0.74                       |
| lipase from <i>Candida cylindracea</i> immobilized in sol-gel-AK | Fluka 62278                            | 046989/1            | 2.94                       |
| Amano lipase from <i>Pseudomonas fluorescens</i>                 | Aldrich 534730                         | MKCB1125V           | 3.30                       |

|                                              |               |      |
|----------------------------------------------|---------------|------|
| [BMIM][PF <sub>6</sub> ]                     | Merck KGaA    | 0.02 |
| [BMIM][PF <sub>6</sub> ], $a_w = 0.11$ (KCl) | Merck KGaA    | 0.46 |
| tetraglyme, $a_w = 0.11$ (KCl)               | Sigma-Aldrich | 2.33 |

**Note:** CALB = *Candida antarctica* lipase B; CLEA = Cross-Linked Enzyme Aggregate.

(a)

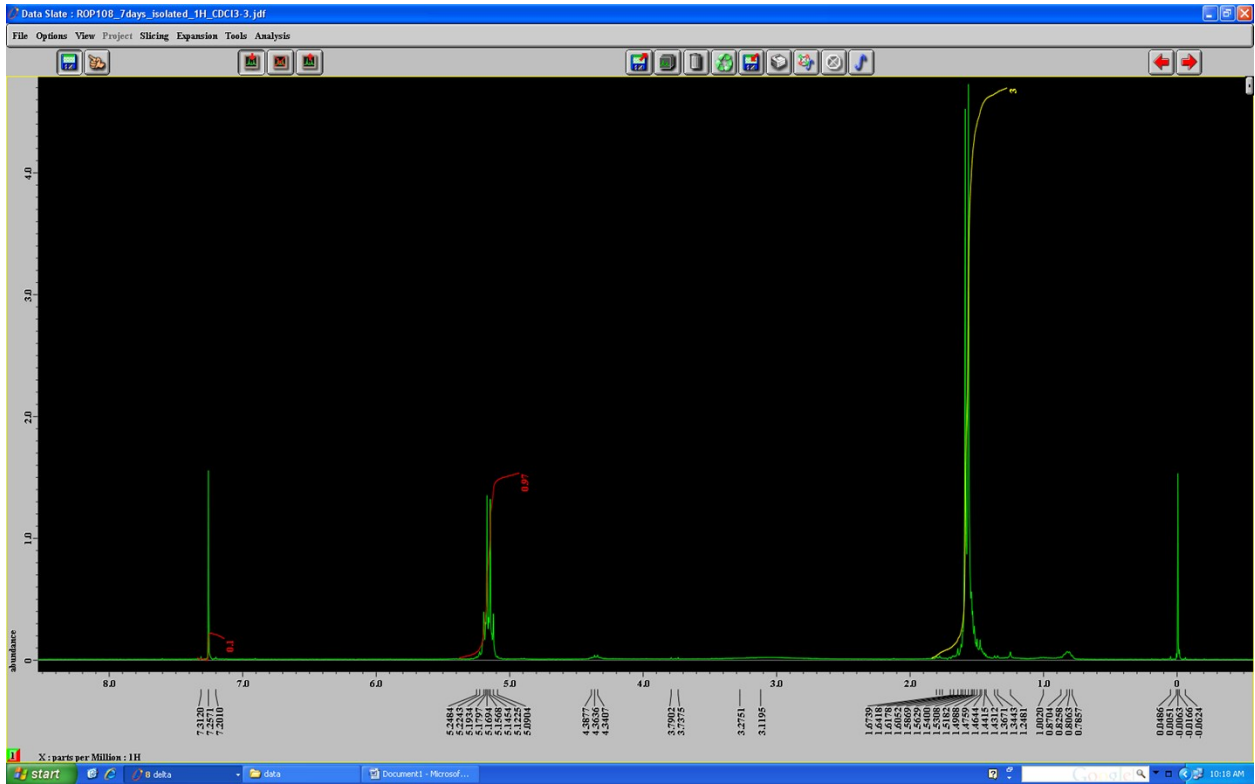

(b)

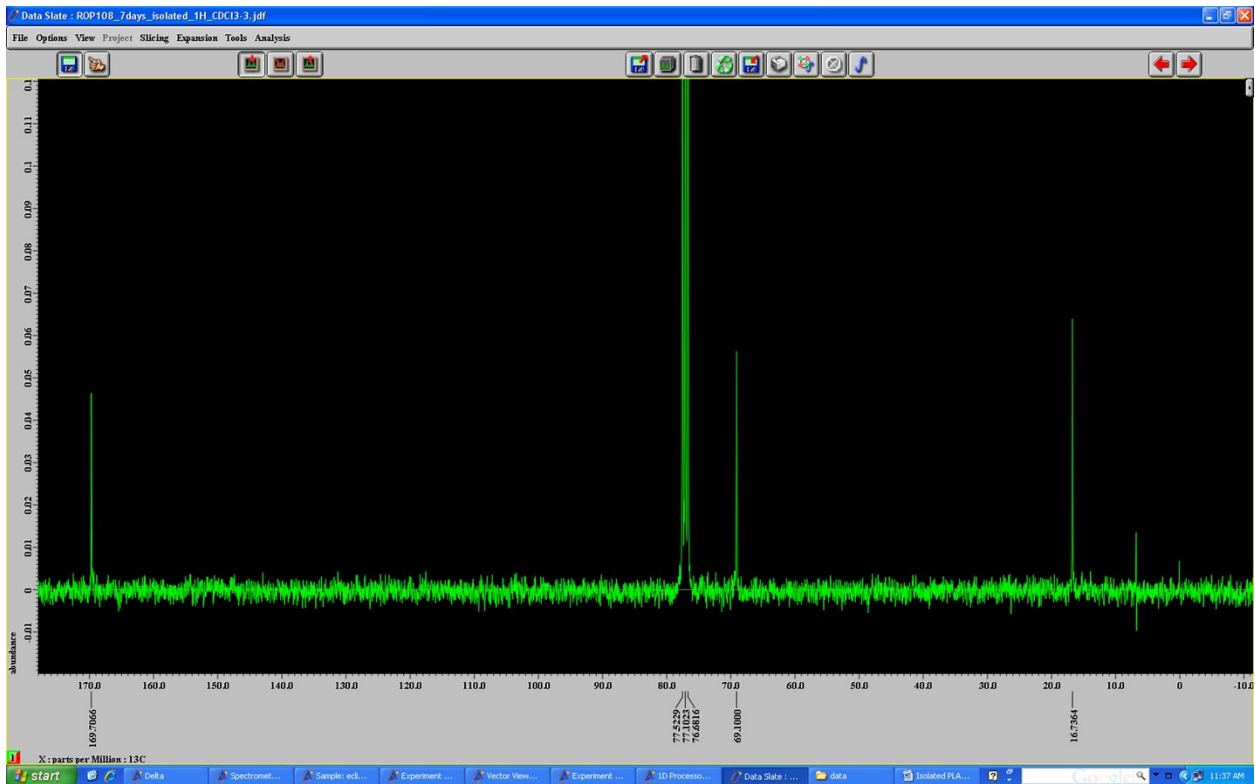

(c)

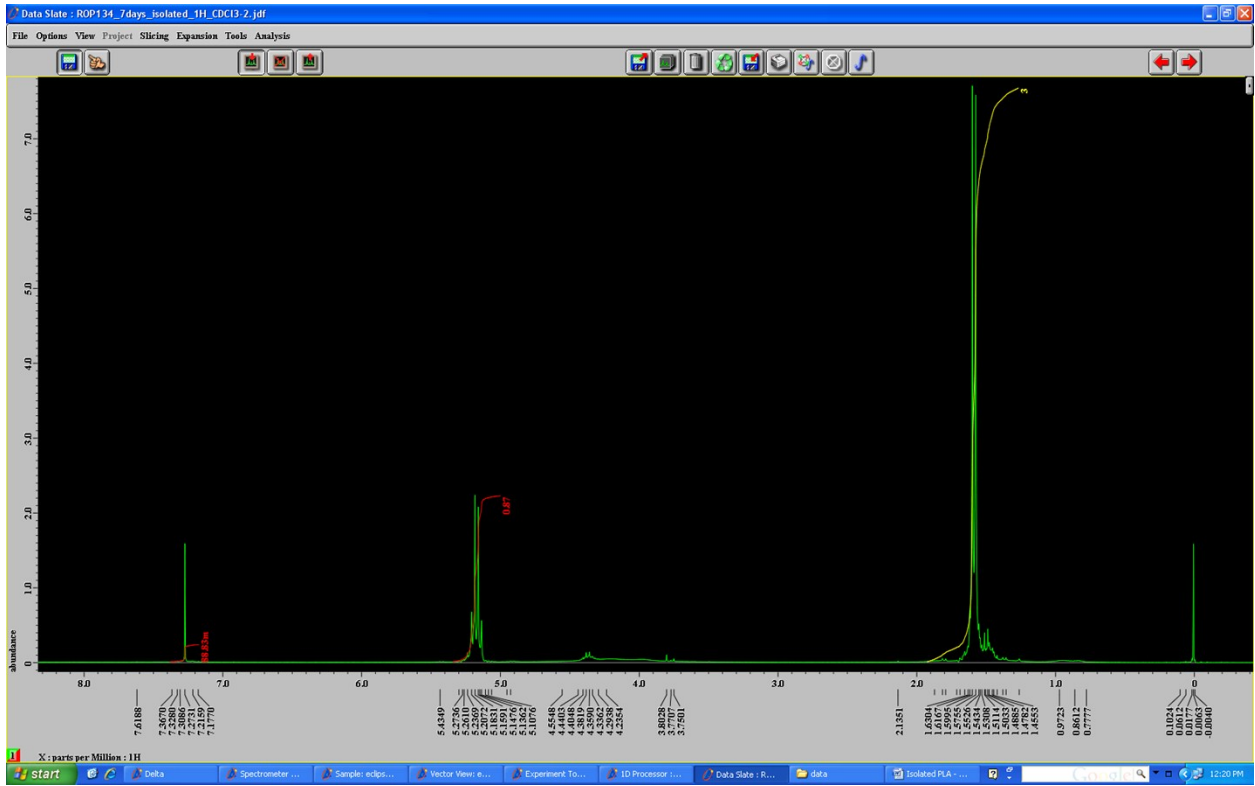

(d)

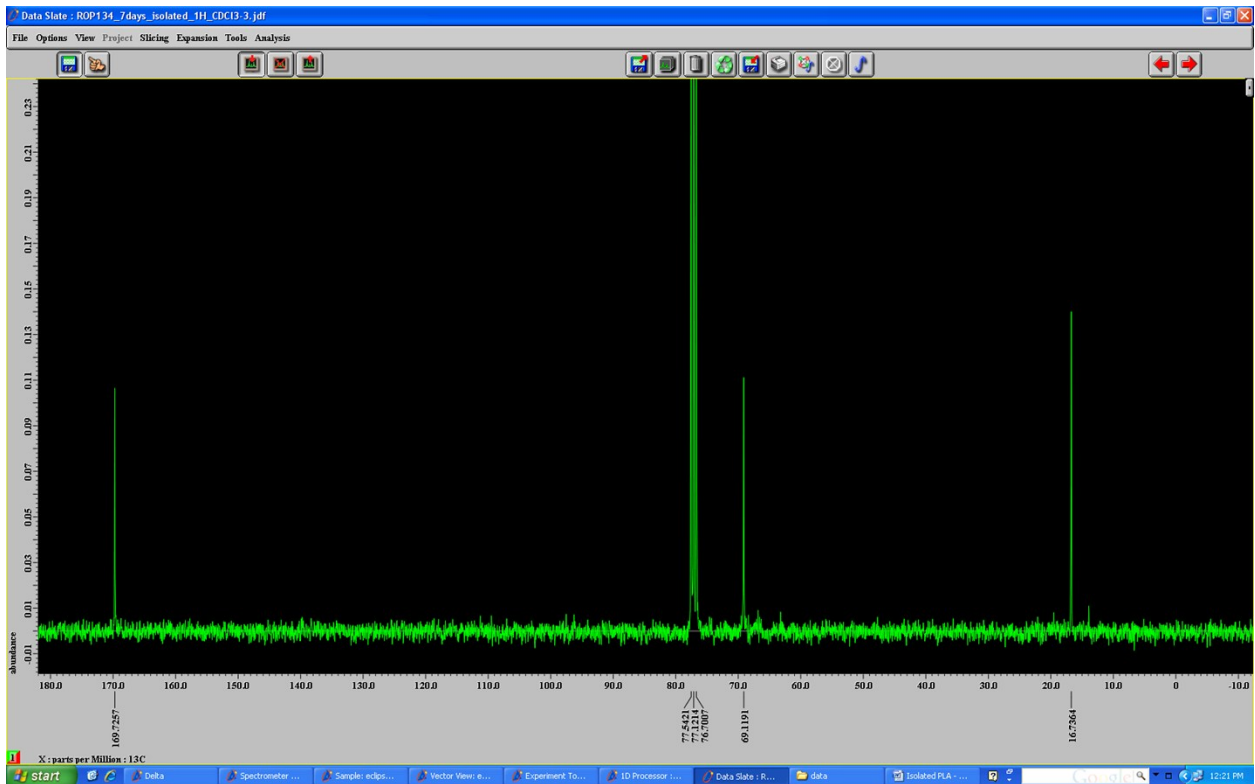

(e)

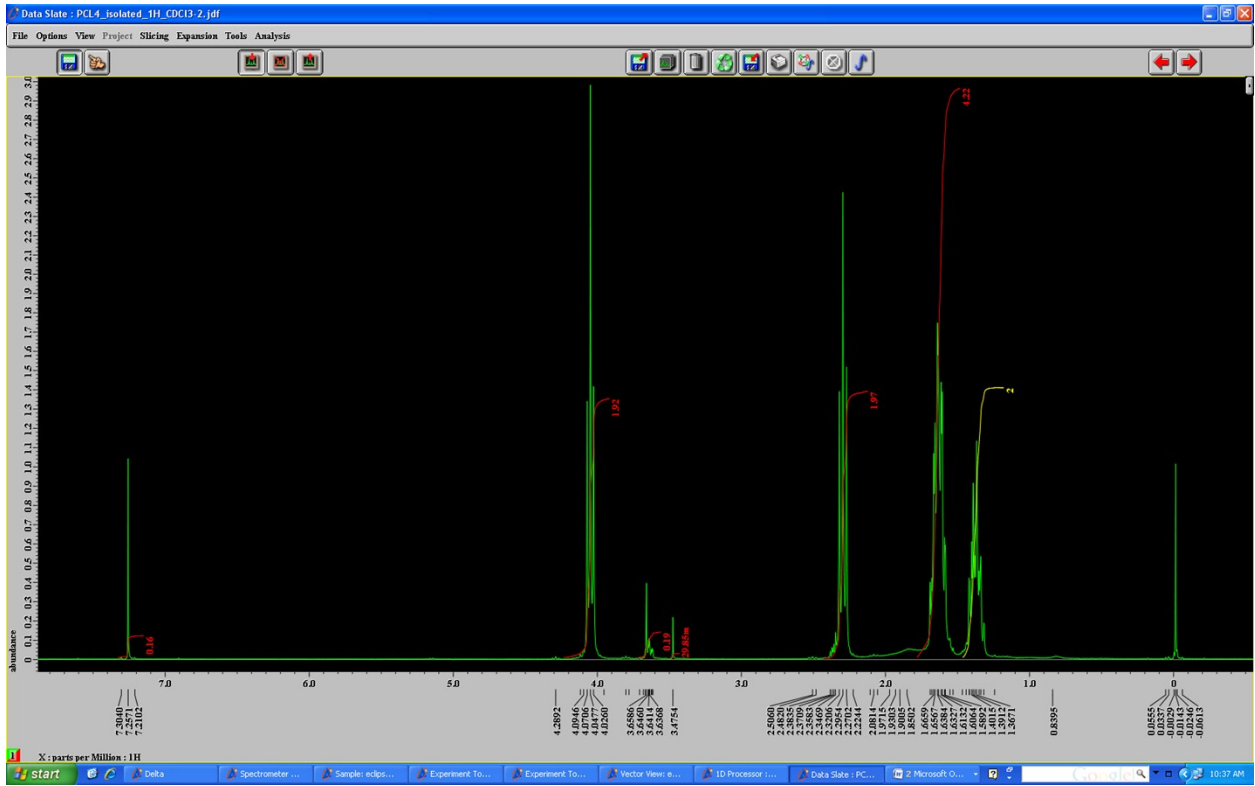

(f)

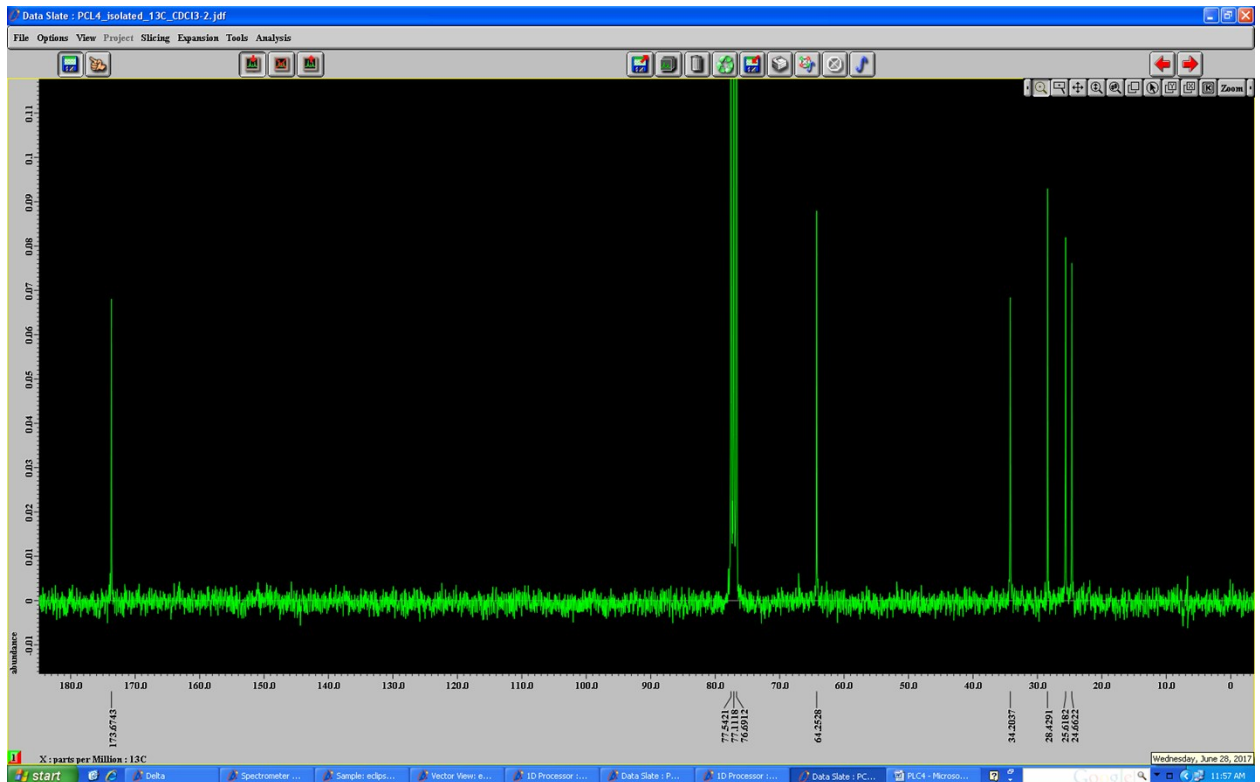

**Figure S1**  $^1\text{H}$  and  $^{13}\text{C}$  NMR spectra of polyesters: (a)  $^1\text{H}$  NMR of PLLA (trial 1 in Table 1); (b)  $^{13}\text{C}$  NMR of PLLA (trial 1 in Table 1); (c)  $^1\text{H}$  NMR of PDLA (trial 37 in Table 2); (d)  $^{13}\text{C}$  NMR of PDLA (trial 37 in Table 2); (e)  $^1\text{H}$  NMR of PCL (trial 3 in Table 3); (f)  $^{13}\text{C}$  NMR of PCL (trial 3 in Table 3).

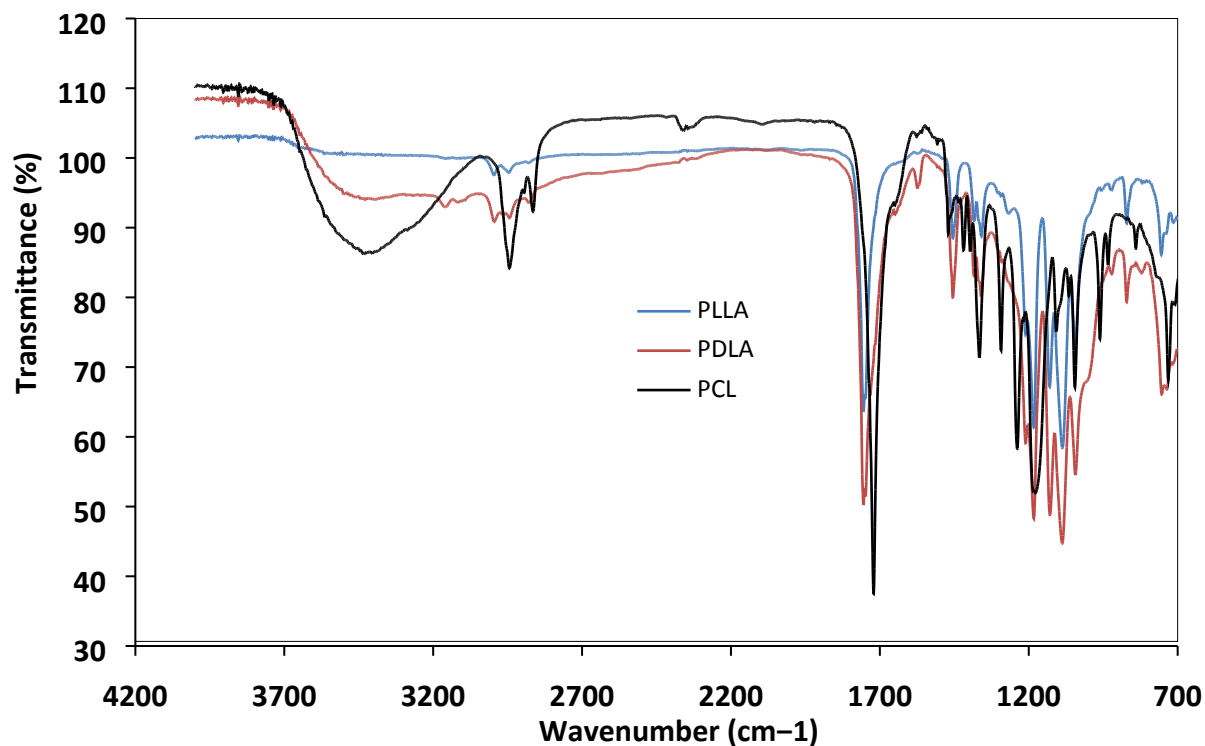

**Figure S2** FT-IR spectra of polyesters.

## REFERENCES

1. S. Matsumura, K. Mabuchi and K. Toshima, *Macromol. Rapid Commun.*, 1997, **18**, 477-482.
2. M. Fujioka, N. Hosoda, S. Nishiyama, H. Noguchi, A. Shoji, D. S. Kumar, K. Katsuraya, S. Ishii and Y. Yoshida, *Sen'i Gakkaishi (doi 10.2115/fiber.62.63)*, 2006, **62**, 63-65.
3. M. Yoshizawa-Fujita, C. Saito, Y. Takeoka and M. Rikukawa, *Polym. Adv. Technol.*, 2008, **19**, 1396-1400.
4. M. Mena, S. Chanfreau, M. Gimeno and E. Bárzana, *Bioprocess Biosyst. Eng.*, 2010, **33**, 1095-1101.
5. M. Mena, A. López-Luna, K. Shirai, A. Tecante, M. Gimeno and E. Bárzana, *Bioprocess Biosyst. Eng.*, 2013, **36**, 383-387.
6. S. Chanfreau, M. Mena, J. R. Porras-Domínguez, M. Ramírez-Gilly, M. Gimeno, P. Roquero, A. Tecante and E. Bárzana, *Bioprocess Biosyst. Eng.*, 2010, **33**, 629-638.



7. R. García-Arrazola, D. A. López-Guerrero, M. Gimeno and E. Bárzana, *J. Supercrit. Fluids*, 2009, **51**, 197-201.
8. M. Hans, H. Keul and M. Moeller, *Macromol. Biosci.*, 2009, **9**, 239-247.
9. S. W. Duchiron, E. Pollet, S. Givry and L. Avérous, *RSC Adv.*, 2015, **5**, 84627-84635.
10. S. Matsumura, K. Tsukada and K. Toshima, *Int. J. Biol. Macromol.*, 1999, **25**, 161-167.
